# Supplementary material for: Enabling interfacial stability of LiCoO2 batteries at an ultrahigh cutoff voltage ≥ 4.65 V via a synergetic electrolyte strategy
Source: Royal Society of Chemistry journal article supplement (doi:10.1039/d2ta09876h), 2023-01-01
Supplement: d2ta09876h1.pdf [file d2ta09876h1.pdf]

## Supporting Information

### **Enabling interfacial stability of LiCoO<sub>2</sub> batteries at ultrahigh cutoff voltage $\geq 4.65$ V with synergetic electrolyte strategy**

*Ang Fu,<sup>a,c,1</sup> Chuanjing Xu,<sup>a,1</sup> Jiande Lin,<sup>a</sup> Yu Su,<sup>a</sup> Haitang Zhang,<sup>a,c</sup> De-Yin Wu,<sup>a</sup> Xiaozheng Zhang,<sup>a,c</sup> Meng Xia,<sup>a,c</sup> Zhongru Zhang,<sup>a</sup> Jianming Zheng,<sup>\*,a,c</sup> Yong Yang<sup>\*,a,b,c</sup>*

<sup>a</sup> State Key Laboratory of Physical Chemistry of Solid Surfaces, College of Chemistry and Chemical Engineering, Xiamen University, Xiamen, Fujian 361005, China.

<sup>b</sup> School of Energy, Xiamen University, Xiamen, Fujian 361005, China

<sup>c</sup> Innovation Laboratory for Sciences and Technologies of Energy Materials of Fujian Province (IKKEM), Xiamen, Fujian 361005, China

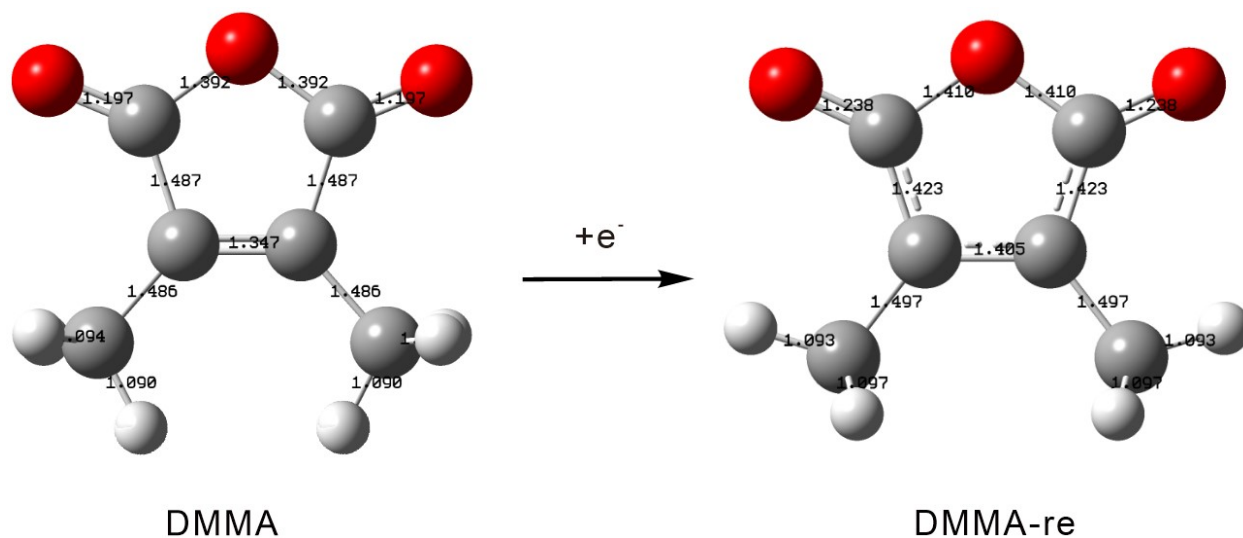

**Figure S1.** The configuration of DMMA and DMMA-re, and the change of bond length after DMMA accepts an electron. The calculation results show that the C=C double bond in DMMA is likely to be broken when DMMA accepts an electron.

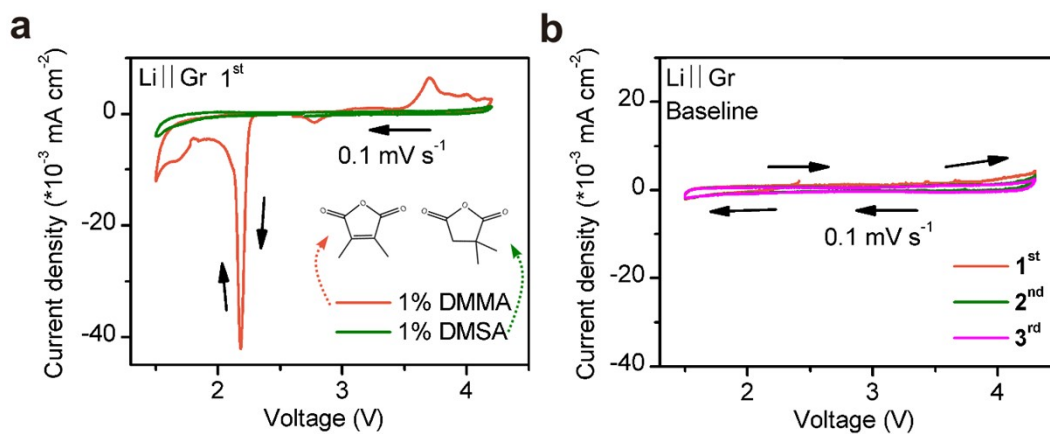

**Figure S2.** (a) Cyclic voltammograms of Li||Gr cells between 1.5-4.2 V in the DMMA and DMSA-containing electrolytes for the first cycle at a scanning sweep of  $0.1 \text{ mV s}^{-1}$  starting from negative scan. (b) Cyclic voltammograms of Li||Gr cell in the baseline electrolyte for 3 cycles at a scanning sweep of  $0.1 \text{ mV s}^{-1}$  starting from negative scan.

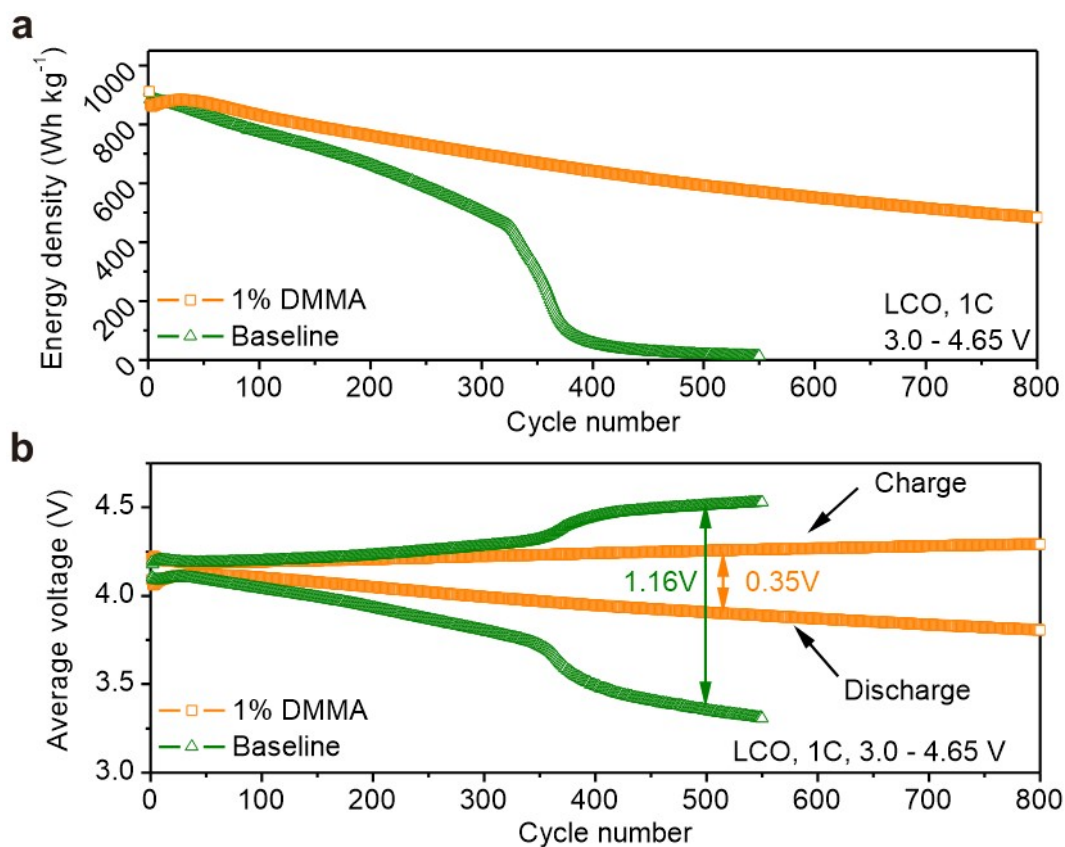

**Figure S3.** (a) Energy density of LCO cathodes in baseline and 1% DMMA-containing electrolytes at 1C at 30 °C in the voltage range of 3-4.65 V. (b) The corresponding mid-point charge and discharge voltages of LCO in baseline and 1% DMMA-containing electrolytes.

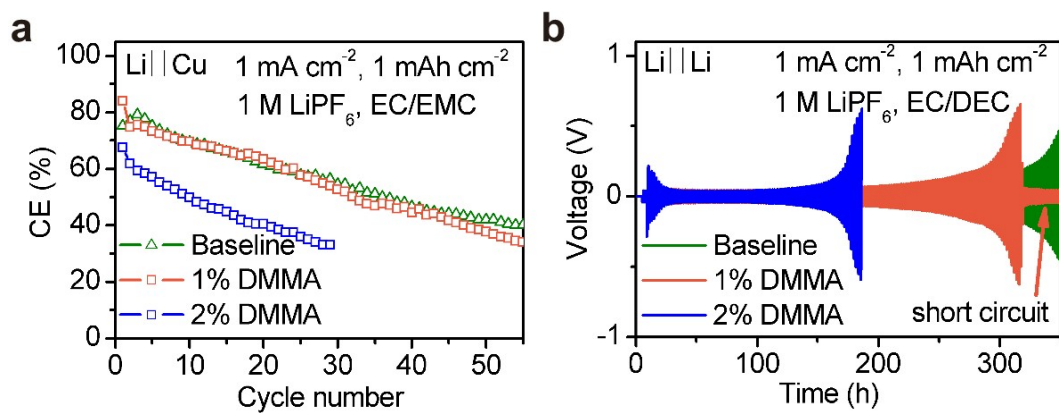

**Figure S4.** (a) Li cycling CEs tested in Li||Cu cells with baseline and DMMA-containing electrolytes at the current density of 1 mA cm<sup>-2</sup> with the deposition capacity of 1 mAh cm<sup>-2</sup>. (b) Cycling performance of symmetric Li||Li cells using baseline and DMMA-containing electrolytes at the current density of 1 mA cm<sup>-2</sup> with the deposition capacity of 1 mAh cm<sup>-2</sup>.

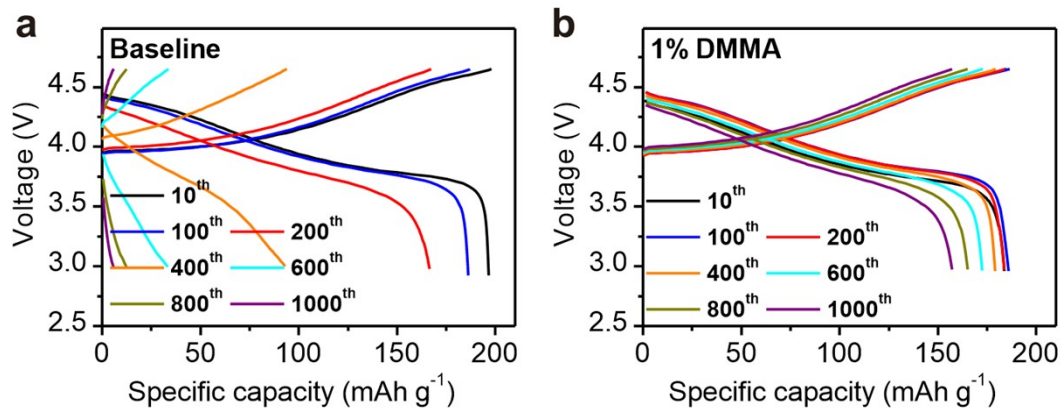

**Figure S5.** Charge/discharge profiles of LCO cycled in (a) baseline and (b) 1% DMMA-containing electrolytes at 2C for charge and 5C for discharge in the voltage range of 3.0-4.65 V.

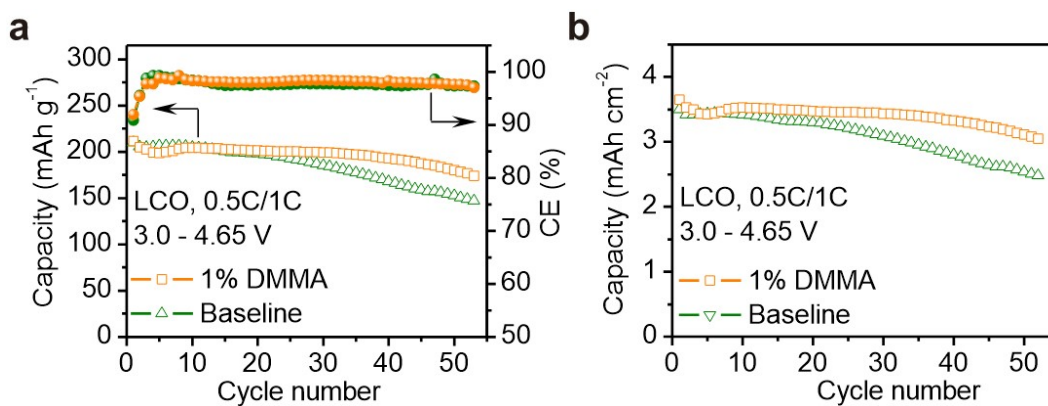

**Figure S6.** (a, b) Capacity as a function of cycle number of high-loading ( $\sim 17.3 \text{ mg cm}^{-2}$ ) LCO cathode with baseline and optimized electrolytes at 3.0-4.65 V at 0.5C charge / 1C discharge rate.

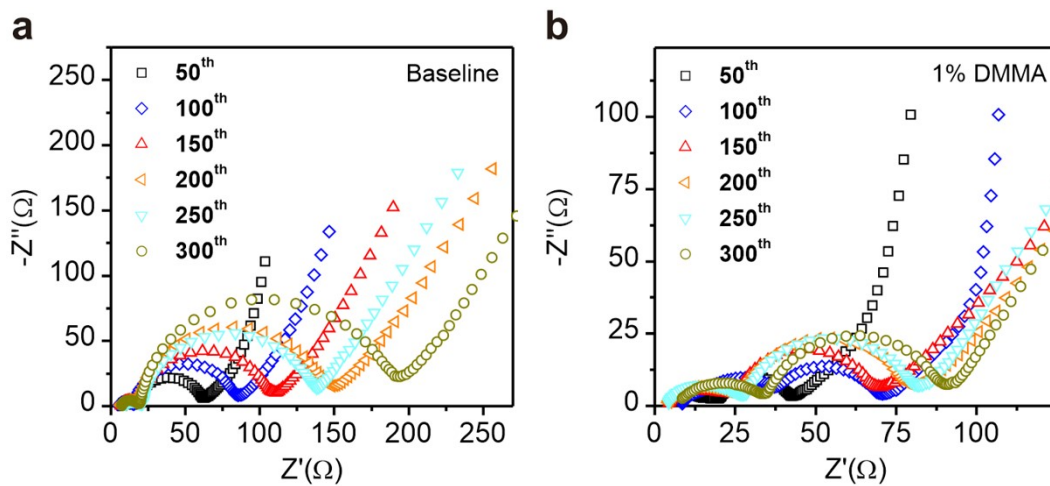

**Figure S7.** EIS spectra of LCO cycled in (a) baseline and (b) 1% DMMA-containing electrolytes at 50<sup>th</sup>, 100<sup>th</sup>, 150<sup>th</sup>, 200<sup>th</sup>, 250<sup>th</sup>, and 300<sup>th</sup> cycles at 1C and 30 °C in the voltage range of 3.0-4.65 V.



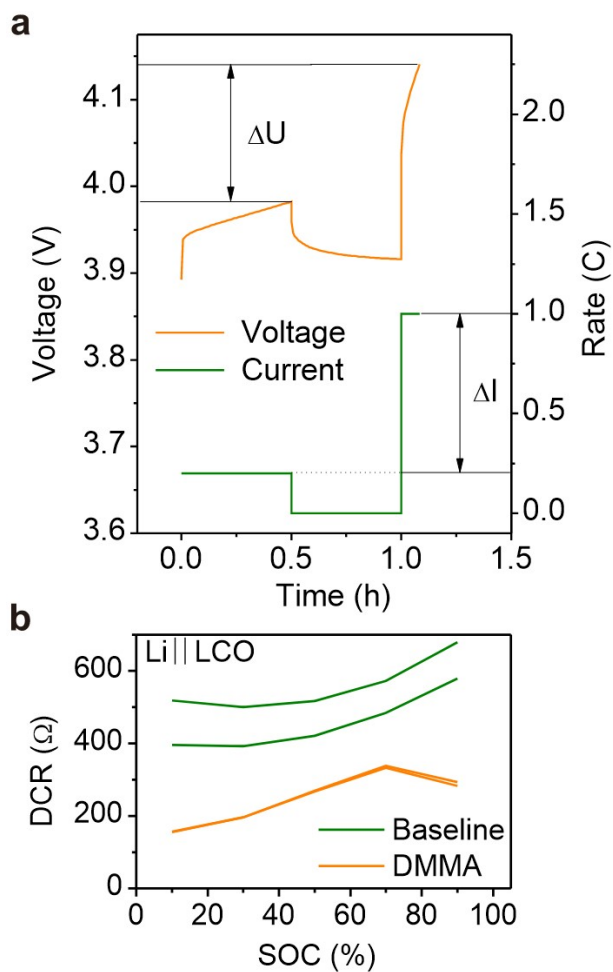

**Figure S8.** (a) Illustration of procedure used for DCR measurement.  $R = \Delta U/\Delta I$ , where  $\Delta U$  is the voltage change in different charge current densities, and the  $\Delta I$  is the difference between 0.2C and 1C (1C = 200 mA g<sup>-1</sup>). (b) DCR values of LCO operated in baseline and 1% DMMA-containing electrolytes at different states of charge (SOCs) after 200 cycles.

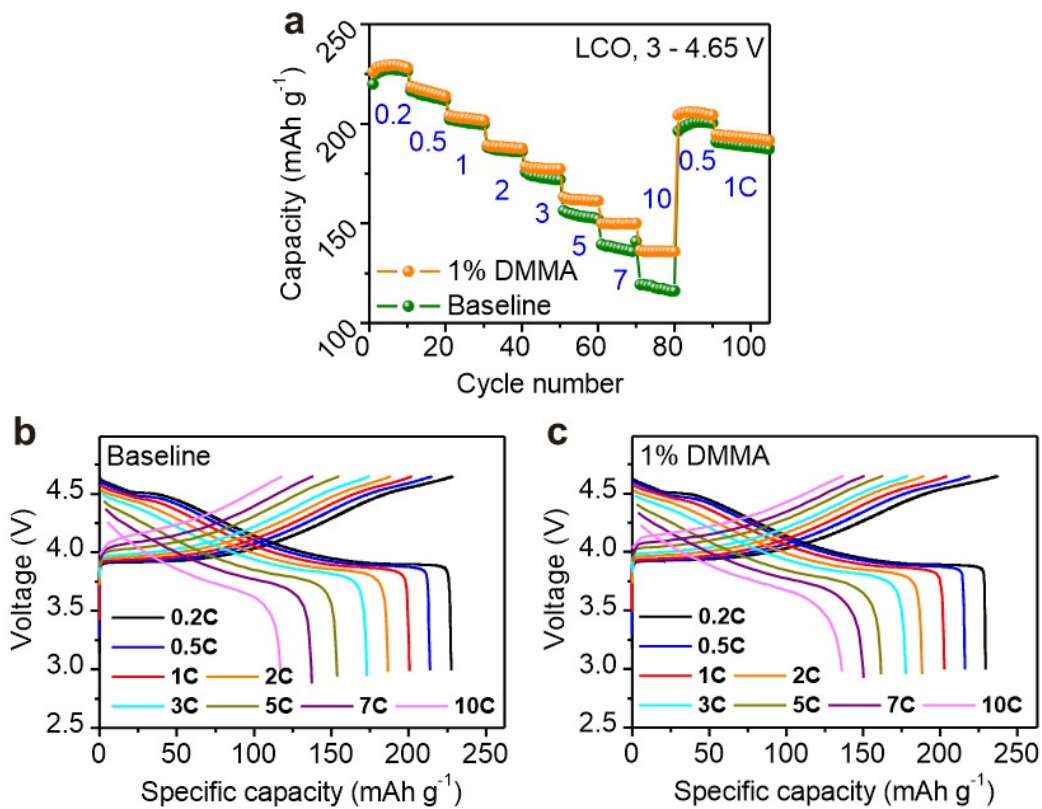

**Figure S9.** (a) Rate performance of LCO with baseline and 1% DMMA-containing electrolytes at 0.2, 0.5, 1, 2, 3, 5, 7, and 10C in the voltage range of 3.0-4.65 V. (b, c) The corresponding charge/discharge curves in (b) baseline and (c) 1% DMMA-containing electrolytes.

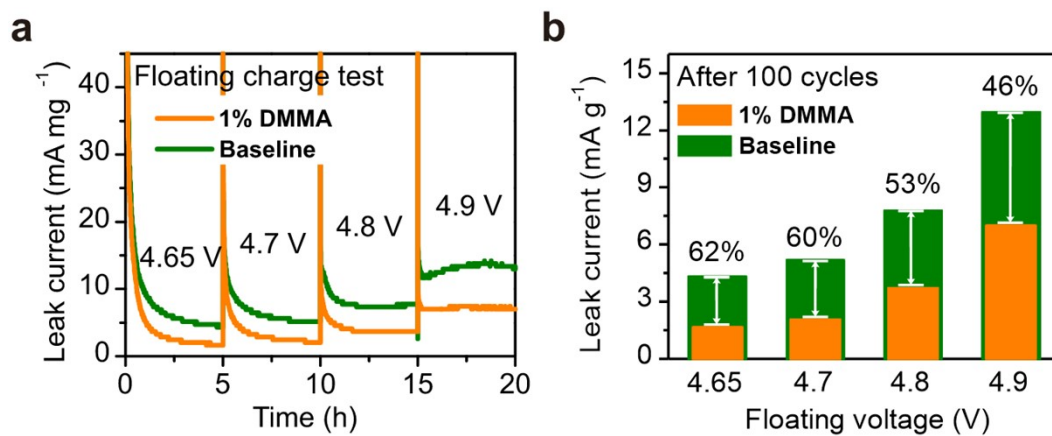

**Figure S10.** (a, b) Amperometry (floating charge) test of LCO batteries at 4.65, 4.7, 4.8 and 4.9 V at 45 °C after 100 cycles in the voltage range of 3.0-4.65 V.

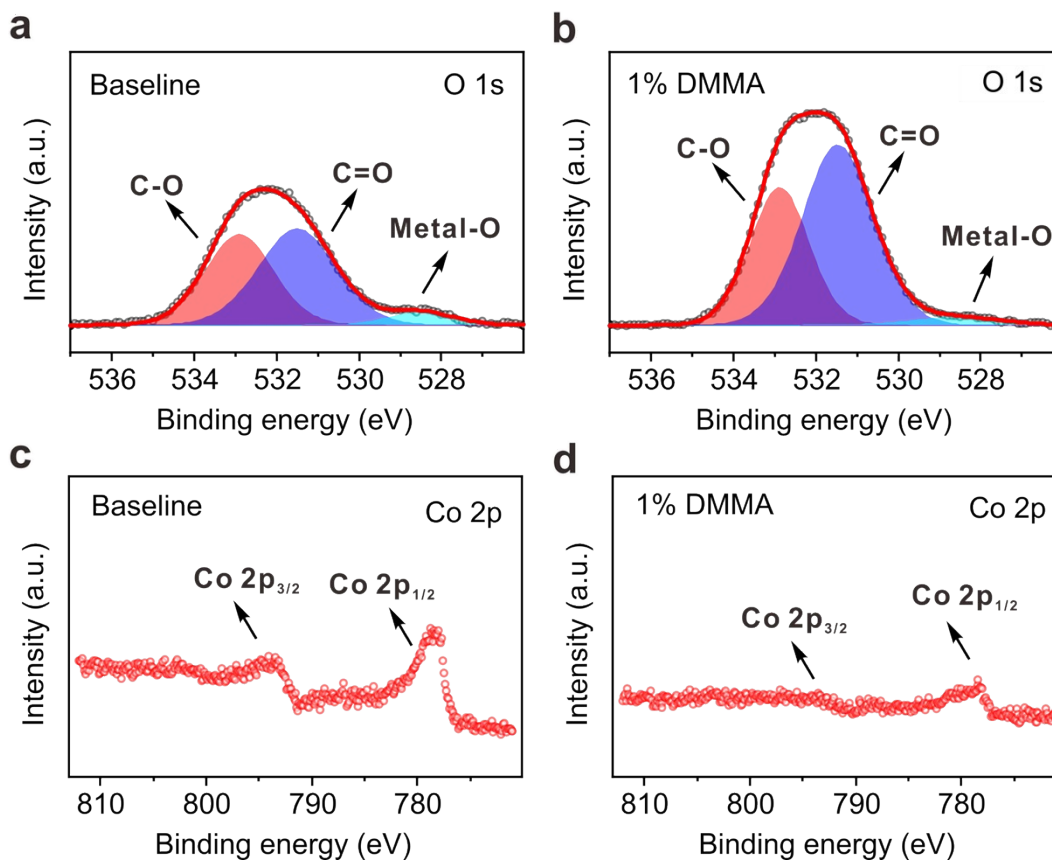

**Figure S11.** O 1s XPS spectra of LCO surface after cycling for 200 cycles in (a) baseline and (b) 1% DMMA-containing electrolytes. (c, d) Co 2p XPS spectra of LCO cathodes after cycling for 200 cycles in (c) baseline and (d) 1% DMMA-containing electrolytes.

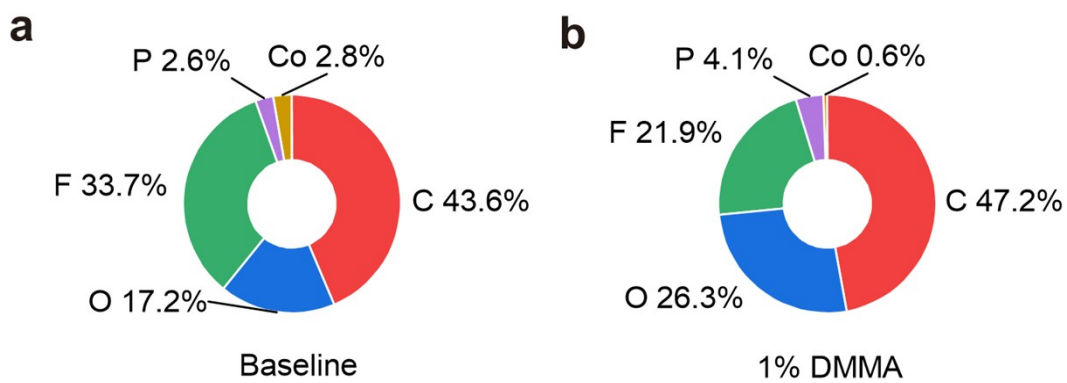

**Figure S12.** The comparison of element percentage of CEI film at LCO surface after cycling (at 1C and cutoff 4.65 V for 200 cycles) in (a) baseline and (b) 1% DMMA-containing electrolytes obtained from XPS results.

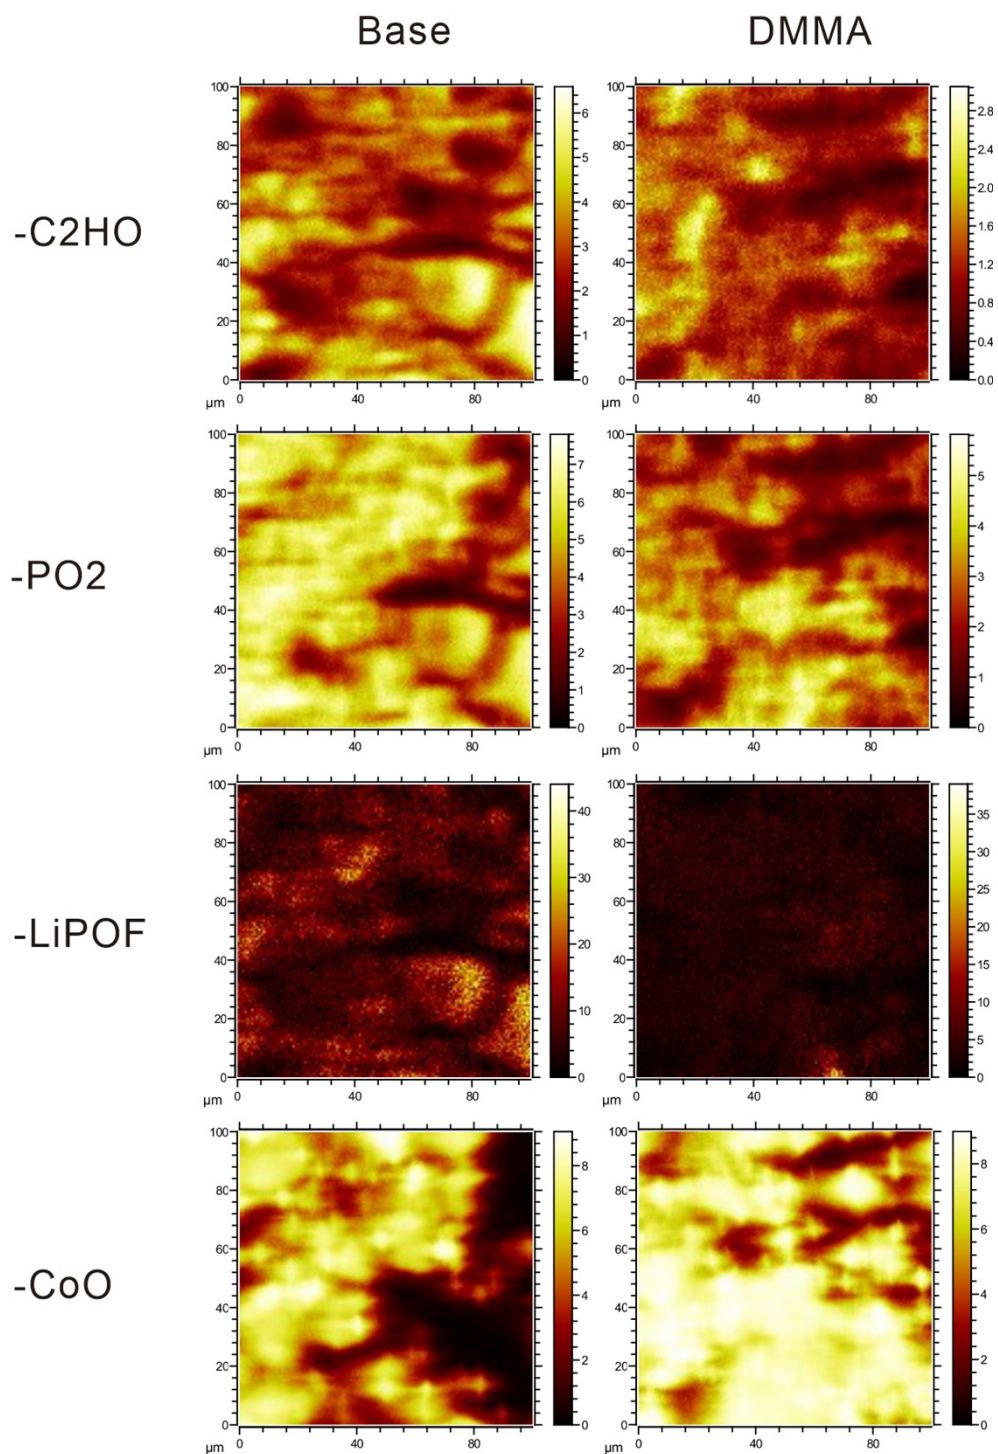

**Figure S13.** The comparison of element percentage of CEI film at LCO surface after cycling (at 1C and cutoff 4.65 V for 200 cycles) in (a) baseline and (b) 1% DMMA-containing electrolytes obtained from XPS results.

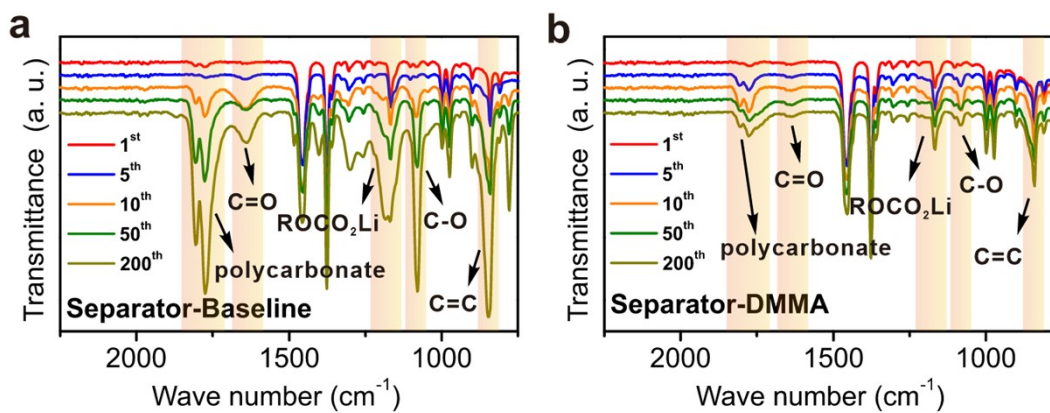

**Figure S14.** FTIR spectra of separators disassembled from LCO batteries cycled in (a) baseline and (b) optimized electrolytes.

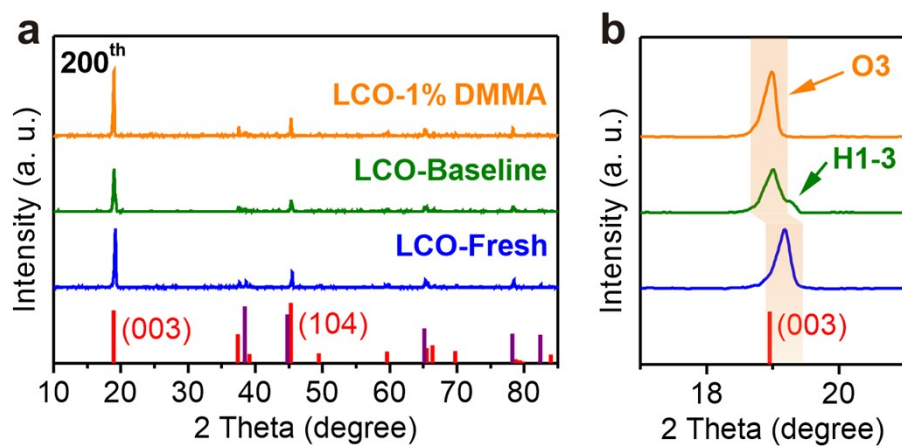

**Figure S15.** XRD patterns of fresh LCO and the LCO cycled in baseline and 1% DMMA-containing electrolytes at 1C and cutoff 4.65 V (discharge state at 200<sup>th</sup> cycle).



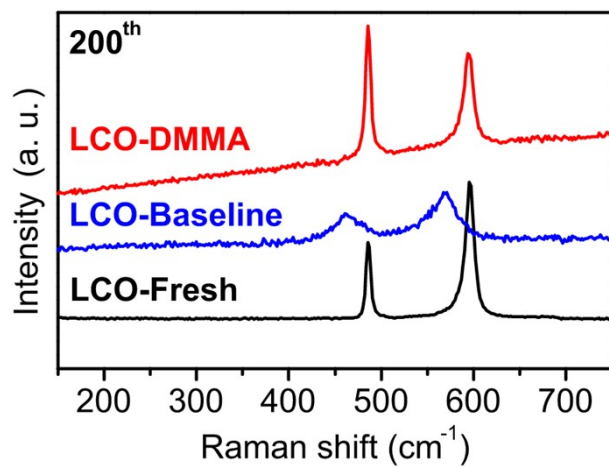

**Figure S16.** Raman spectra of fresh LCO and the LCO cycled in (a) baseline and (b) 1% DMMA-containing electrolytes at 1C and 30 °C in the voltage range of 3.0-4.65 V.

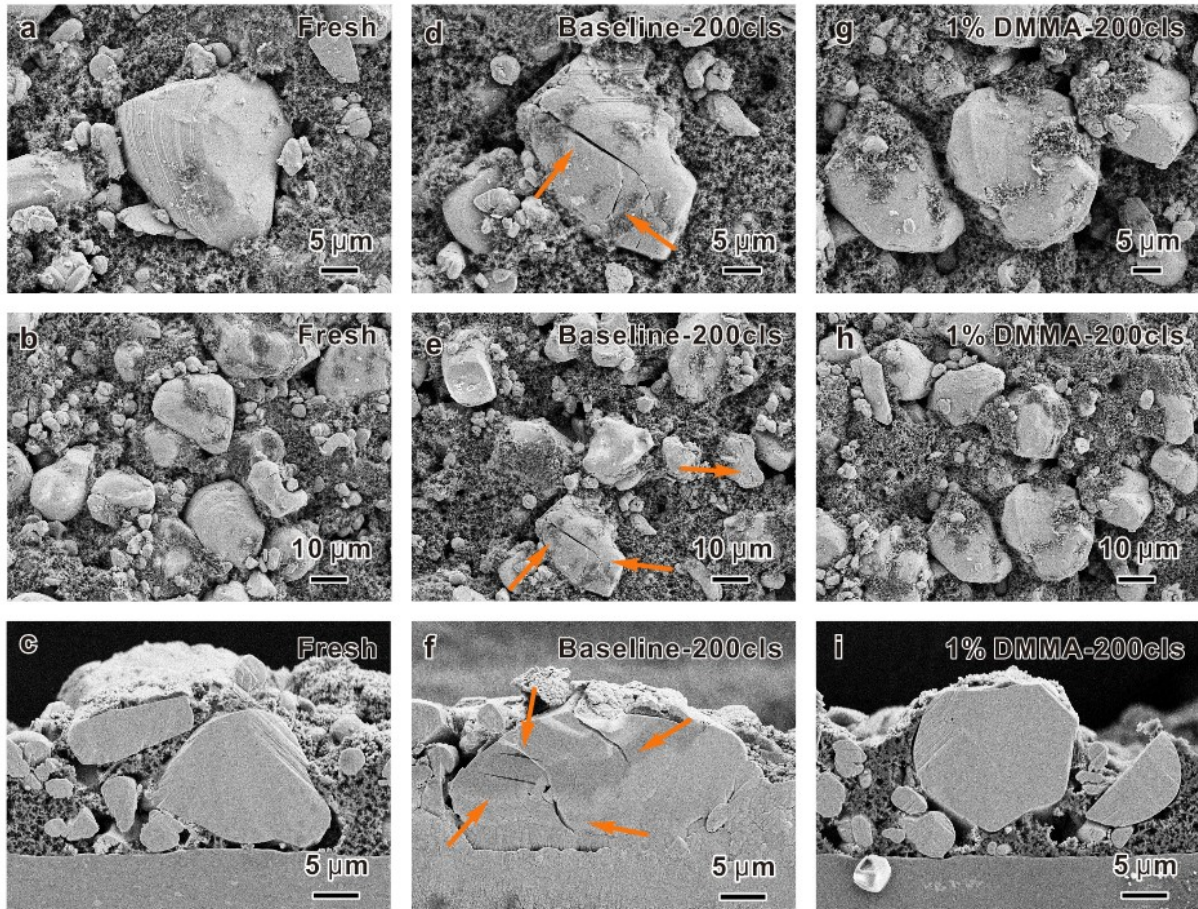

**Figure S17.** SEM images of the surface and cross-sectional morphologies of (a-c) fresh LCO cathode, and the LCO cathodes cycled at 1C and cutoff 4.65 V for 200 cycles in (d-f) baseline and (g-i) optimized electrolytes at different regions.

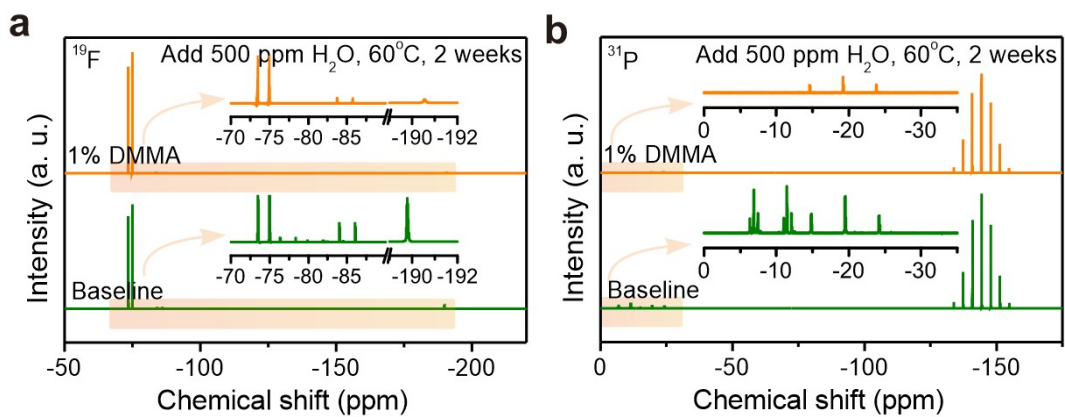

**Figure S18.** NMR spectra of (a)  $^{19}\text{F}$  and (b)  $^{31}\text{P}$  of baseline and 1% DMMA-containing electrolytes added with 500 ppm H<sub>2</sub>O and stored at 60 °C for 2 weeks.

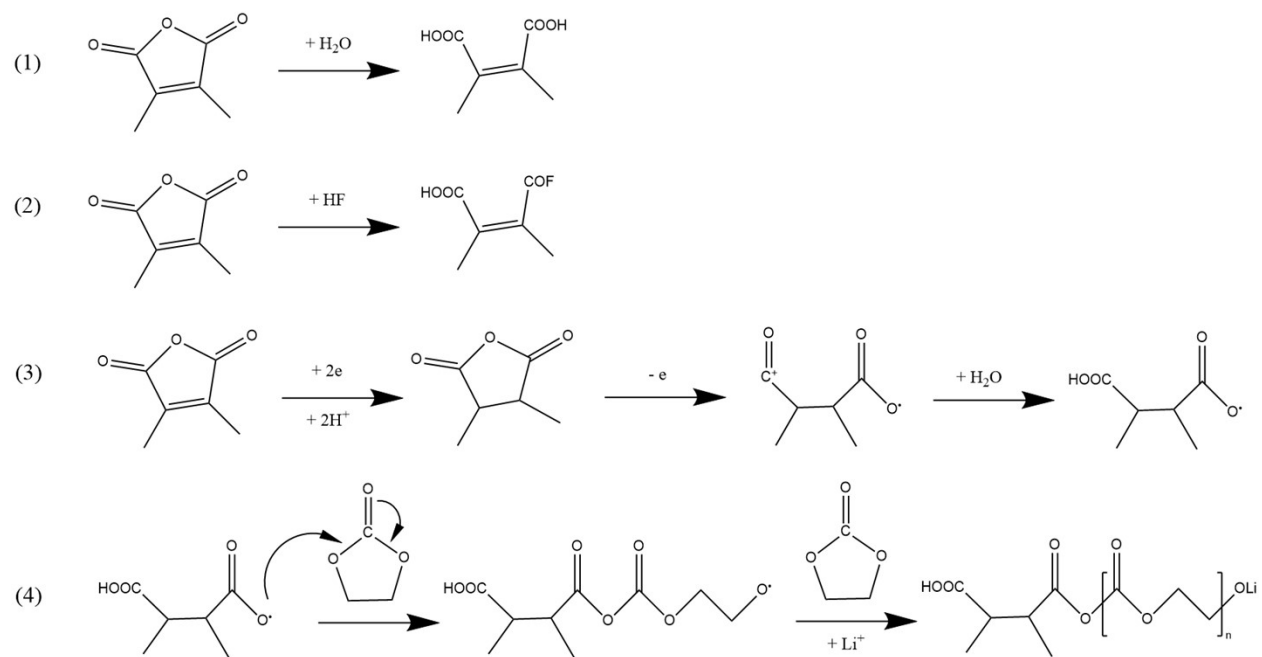

**Figure S19.** The possible reaction mechanisms of DMMA additive.

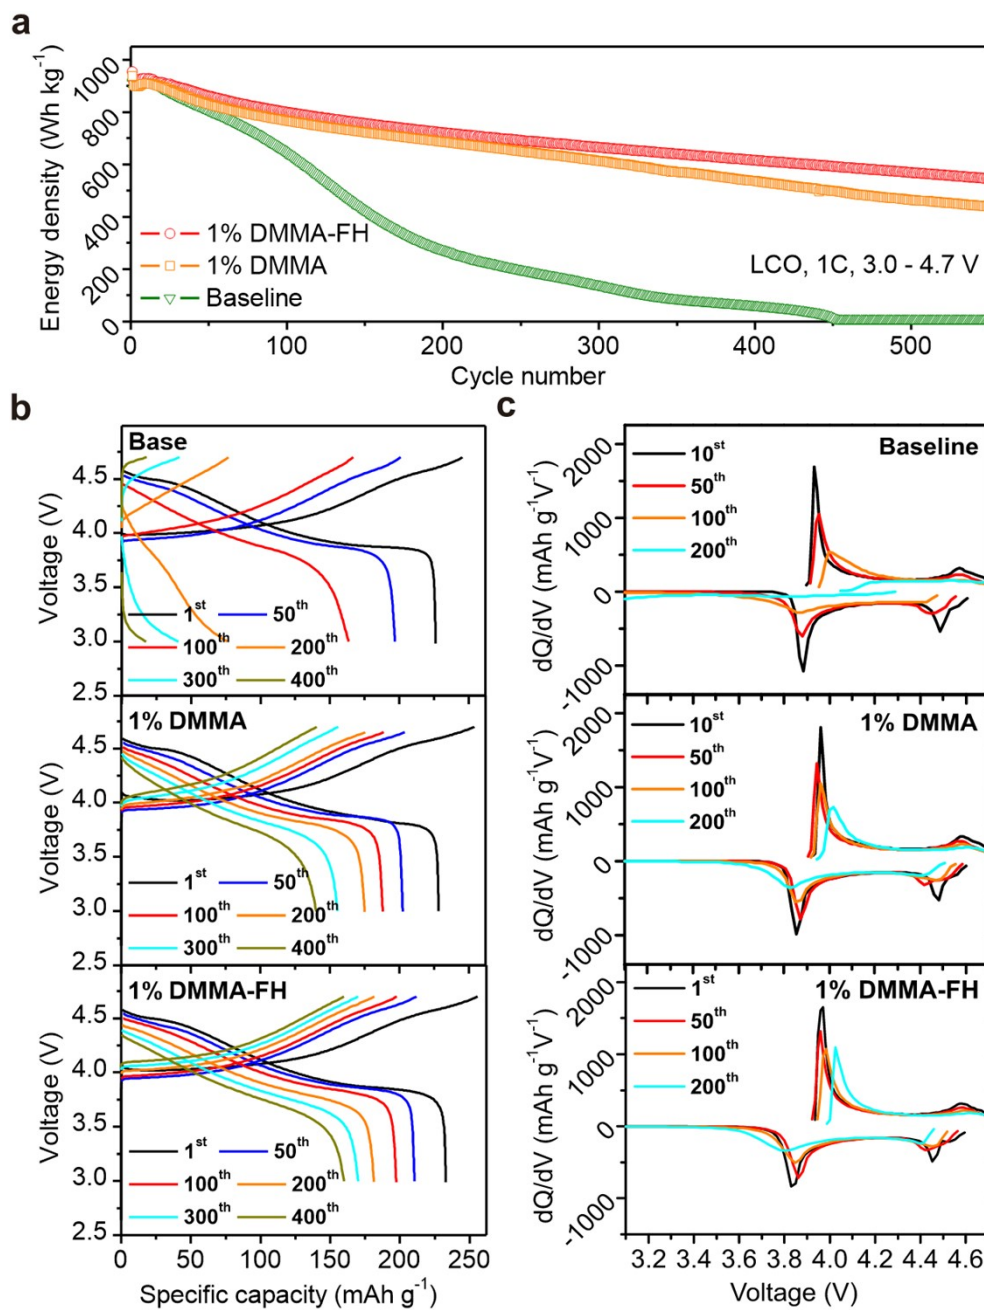

**Figure S20.** (a) Energy density as a function of cycle number of LCO with baseline, optimized (adding 1% DMMA) and upgraded (adding 1% DMMA, 5% FEC, and 1% HTCN) electrolytes at 3.0-4.7 V at 1C. (b) The corresponding charge/discharge curves and (c) dQ/dV profiles at selected cycles in the different electrolytes.

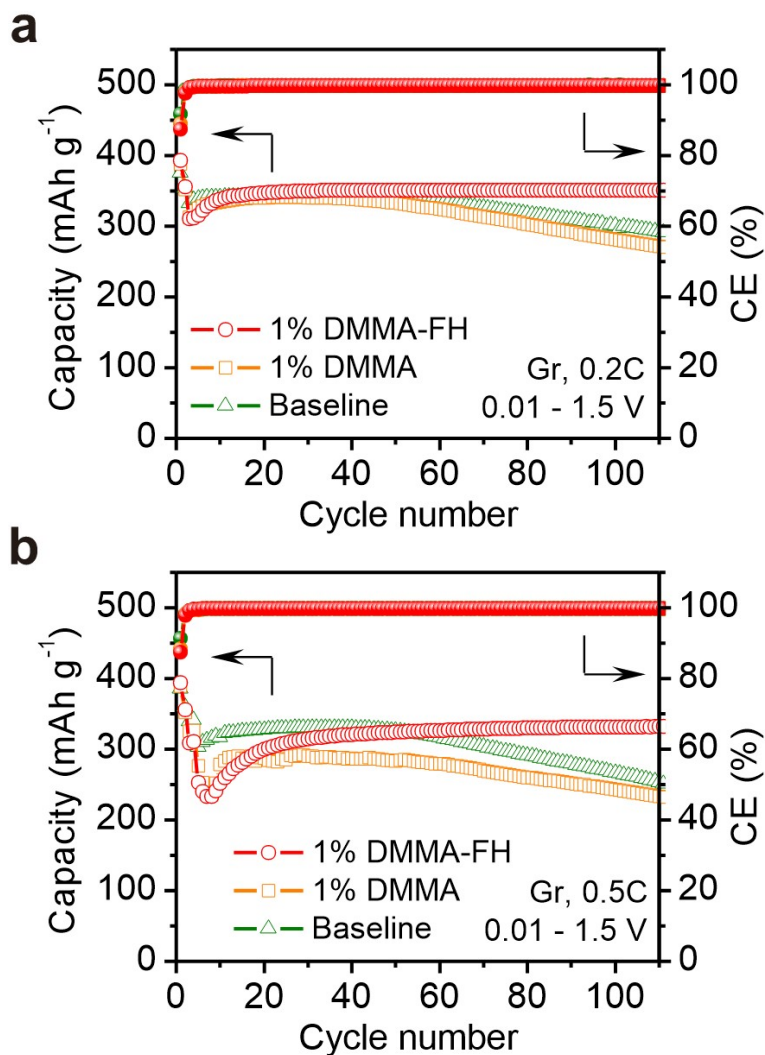

**Figure S21.** Cycling performance of Li||Gr half batteries with baseline, optimized (adding 1% DMMA) and upgraded (adding 1% DMMA, 5% FEC, and 1% HTCN) electrolytes at (a) 0.2C and (b) 0.5C in the voltage range of 0.01-1.5 V.

**Table S1.** Comparison of electrochemical performance of the electrolyte additives and recipes reported for high-voltage LCO batteries.

| Electrolyte additives and recipes                                     | Capacity retention (%)                                                                     | Voltage range (V)                      | Areal loading (mg cm <sup>-2</sup> ) | Current rate or density (C or mA g <sup>-1</sup> ) | Ref. |
|-----------------------------------------------------------------------|--------------------------------------------------------------------------------------------|----------------------------------------|--------------------------------------|----------------------------------------------------|------|
| 5-Acetylthiophene-2-carbonitrile                                      | 91 (200 <sup>th</sup> )                                                                    | 3-4.5                                  | 2.3–2.6                              | 180                                                | 1    |
| Di(methylsulfonyl)ethane                                              | 66.5 (100 <sup>th</sup> )                                                                  | 3-4.5                                  | 15.4                                 | 1C                                                 | 2    |
| Tris(2-cyanoethyl)borate                                              | 78.2 (200 <sup>th</sup> )                                                                  | 2.75-4.5                               | 2                                    | 180                                                | 3    |
| Dihydro-1,3,2-dioxathiol[1,3,2]dioxathiole 2,2,5,5-tetraoxide         | 77.7 (250 <sup>th</sup> )                                                                  | 3.0-4.5                                | 1.86                                 | 0.7C                                               | 4    |
| Aluminum isopropoxide                                                 | 78.1 (200 <sup>th</sup> )                                                                  | 3-4.6                                  | 5                                    | 200                                                | 5    |
| Fluoroethylene carbonate (FEC) and 1,3,6-hexanetricarbonitrile (HTCN) | 75 (300 <sup>th</sup> )                                                                    | 3-4.6                                  | 6                                    | 200                                                | 6    |
| Triisopropanolamine cyclic borate                                     | 82.2 (200 <sup>th</sup> )<br><b>85.2 (100<sup>th</sup>)</b>                                | 3-4.6<br><b>3-4.65</b>                 | 2-3<br>2-3                           | 200<br>200                                         | 7    |
| 2,4,6-Tris(4-fluorophenyl)boroxin                                     | 84.6 (200 <sup>th</sup> )<br><b>65.8 (200<sup>th</sup>)</b><br><b>74 (85<sup>th</sup>)</b> | 3-4.6<br><b>3-4.65</b><br><b>3-4.7</b> | 2-3<br>2-3<br>2-3                    | 200<br>200<br>200                                  | 8    |
| 4-Methylmorpholine-                                                   | 83.5 (200 <sup>th</sup> )                                                                  | 3-4.6                                  | 2-3                                  | 200                                                | 9    |

|                                                                       |                                |               |      |            |                  |
|-----------------------------------------------------------------------|--------------------------------|---------------|------|------------|------------------|
| 2,6-dione                                                             | <b>72.3 (200<sup>th</sup>)</b> | <b>3-4.65</b> | 2-3  | 200        |                  |
|                                                                       | <b>55.4 (200<sup>th</sup>)</b> | <b>3-4.7</b>  | 2-3  | 200        |                  |
| KSeCN                                                                 | 55.2 (750 <sup>th</sup> )      | 3-4.6         | 3    | 200        | 10               |
| Potassium (4-methylsulfonylphenyl) trifluoroborate                    | <b>70.3 (300<sup>th</sup>)</b> | <b>3-4.65</b> | 3    | 200        | 11               |
| Vinylene carbonate and KBF <sub>4</sub>                               | 91.9 (300 <sup>th</sup> )      | 3-4.6         | ~5   | 274        | 12               |
| 1M LiFSI, in N,N-dimethyltrifluoromethanesulfonamide                  | 89 (200 <sup>th</sup> )        | 3-4.55        | ~13  | 150        | 13               |
|                                                                       | 85 (100 <sup>th</sup> )        | 3-4.6         | ~13  | 150        |                  |
| 1 M LiPF <sub>6</sub> in FEC/FEMC/TTE +2 wt% TMSB                     | 74.8 (300 <sup>th</sup> )      | 3-4.6         | ~18  | 137        | 14               |
| 0.3 M LiDFOB + 0.2 M LiBF <sub>4</sub> in DEC/FEC/FB                  | 85.6 (120 <sup>th</sup> )      | 3-4.6         | 20.4 | 49         | 15               |
| <b>2,3-Dimethylmaleic anhydride (DMMA)</b>                            | <b>70.7 (500<sup>th</sup>)</b> | <b>3-4.65</b> | ~3   | <b>200</b> | <b>This work</b> |
|                                                                       | <b>69.4 (400<sup>th</sup>)</b> | <b>3-4.65</b> | ~8   | <b>200</b> |                  |
|                                                                       | <b>69.6 (300<sup>th</sup>)</b> | <b>3-4.7</b>  | ~3   | <b>200</b> |                  |
| <b>1M LiPF<sub>6</sub>, in EC/EMC, + 1% DMMA, 5% FEC, and 1% HTCN</b> | <b>75.9 (300<sup>th</sup>)</b> | <b>3-4.7</b>  | ~3   | <b>200</b> | <b>This work</b> |

---



**Table S2.** Comparison of electrochemical performance of this research with the modified LCO at the cutoff voltage over 4.6 V.

| Modified LCO                                                                                                        | Capacity retention (%)                                 | Voltage range (V) | Areal loading (mg cm <sup>-2</sup> ) | Current rate or density (C or mA g <sup>-1</sup> ) | Ref. |
|---------------------------------------------------------------------------------------------------------------------|--------------------------------------------------------|-------------------|--------------------------------------|----------------------------------------------------|------|
| Al, Ti-bulk doped and Mg-surface doped LCO                                                                          | 78 (300 <sup>th</sup> )                                | 3-4.6             | ~1.5                                 | 70                                                 | 16   |
| Ti, Mg, Al co-doped LCO                                                                                             | 86 (100 <sup>th</sup> )                                | 3-4.6             | --                                   | 137                                                | 17   |
| Mg-pillared LCO                                                                                                     | 84 (100 <sup>th</sup> )                                | 3-4.6             | ~3                                   | 270                                                | 18   |
| MgF <sub>2</sub> -doped LCO                                                                                         | 92 (100 <sup>th</sup> )                                | 3-4.6             | ~3                                   | 270                                                | 19   |
| Al, F co-doped LCO                                                                                                  | 86.9 (200 <sup>th</sup> )                              | 3-4.6             | ~3                                   | 100                                                | 20   |
| Al, F, Mg gradient co-doped LCO                                                                                     | 80.9 (500 <sup>th</sup> )                              | 3-4.6             | ~3                                   | 137                                                | 21   |
| Ni, P co-doped LCO                                                                                                  | 92.6 (100 <sup>th</sup> )                              | 3-4.6             | 4.2-4.6                              | 137                                                | 22   |
| Li <sub>2</sub> SO <sub>4</sub> /Li <sub>x</sub> Co <sub>2</sub> O <sub>4</sub> coated and trace S-doped LCO        | 88 (100 <sup>th</sup> )                                | 2.8-4.6           | 2                                    | 280                                                | 23   |
| Li, Al, F-modified LCO                                                                                              | 91 (200 <sup>th</sup> )                                | 3-4.6             | ~12.6                                | 27.4                                               | 24   |
| AlPO <sub>4</sub> and Li <sub>3</sub> PO <sub>4</sub> co-coated LCO                                                 | 88.6 (200 <sup>th</sup> )<br>79.7 (400 <sup>th</sup> ) | 3-4.6             | 3-4                                  | 137                                                | 25   |
| Li <sub>1.5</sub> Al <sub>0.5</sub> Ti <sub>1.5</sub> (PO <sub>4</sub> ) <sub>3</sub> -coated LCO                   | 88.3 (100 <sup>th</sup> )                              | 3-4.6             | 3                                    | 137                                                | 26   |
| Surface Se-substituted LCO                                                                                          | 86.7 (120 <sup>th</sup> )                              | 3-4.62            | 16-17                                | 70                                                 | 27   |
| Al-doped ZnO and Li <sub>1.5</sub> Al <sub>0.5</sub> Ge <sub>1.5</sub> P <sub>3</sub> O <sub>12</sub> co-coated LCO | 77.1 (300 <sup>th</sup> )                              | 3-4.6             | 2                                    | 185                                                | 28   |
| AlZnO-coated LCO                                                                                                    | 65.7 (500 <sup>th</sup> )                              | 3-4.6             | --                                   | 185                                                | 29   |

|                                                                                                                                     |                                                                                                                        |                                                 |            |                   |    |
|-------------------------------------------------------------------------------------------------------------------------------------|------------------------------------------------------------------------------------------------------------------------|-------------------------------------------------|------------|-------------------|----|
| TiO <sub>2</sub> and LiF co-coated LCO                                                                                              | 85.4 (100 <sup>th</sup> )                                                                                              | 3-4.6                                           | --         | 70                | 30 |
| Al <sub>2</sub> O <sub>3</sub> -coated LCO (by ALD method)                                                                          | 88 (200 <sup>th</sup> )                                                                                                | 3-4.6                                           | 2          | 95                | 31 |
| LiF, KF, and LiCo <sub>1-x</sub> Al <sub>x</sub> O <sub>2</sub> modified LCO                                                        | 78.7 (100 <sup>th</sup> )<br><b>60.4 (200<sup>th</sup>)</b>                                                            | 3-4.6<br><b>3-4.7</b>                           | --<br>--   | 0.5C<br>0.5C      | 32 |
| F-surface doped and LiF/Li <sub>2</sub> CoTi <sub>3</sub> O <sub>8</sub> coated LCO                                                 | 82.5 (100 <sup>th</sup> )<br>81.2 (200 <sup>th</sup> )                                                                 | 3-4.6<br>3-4.6                                  | 8-9<br>8-9 | 137<br>27.4       | 33 |
| Mg-doped and Co <sub>x</sub> B <sub>y</sub> -coated LCO                                                                             | 94.6 (100 <sup>th</sup> )                                                                                              | 3-4.6                                           | 2.5        | 270               | 34 |
| Mg-doped and Se-coated LCO                                                                                                          | 72.9 (1000 <sup>th</sup> )<br><b>68.6 (400<sup>th</sup>)</b><br><b>80.7 (100<sup>th</sup>)</b>                         | 3-4.6<br><b>3-4.65</b><br><b>3-4.7</b>          | <br>~3     | 200<br>200<br>200 | 35 |
| Li, Al, F-modified LCO combining with optimized electrolyte (1M LiPF <sub>6</sub> , in FEC/DFEC/DMC)                                | 77.8 (500 <sup>th</sup> )                                                                                              | 3-4.6                                           | --         | 110               | 36 |
| RbAlF <sub>4</sub> -modified LCO with optimized electrolyte (1M LiPF <sub>6</sub> , in FEC/DFEC/DMC)                                | 91.5 (100 <sup>th</sup> )<br>80.2 (500 <sup>th</sup> )<br><b>82 (100<sup>th</sup>)</b><br><b>76 (100<sup>th</sup>)</b> | 3-4.6<br>3-4.6<br><b>3-4.65</b><br><b>3-4.7</b> | <br>~6     | 110               | 37 |
| Coherent LiCoPO <sub>4</sub> -coated LCO combining with optimized electrolyte (1M LiPF <sub>6</sub> , in EC/EMC, + 5% FEC, +1% SUN) | 87 (300 <sup>th</sup> )<br><b>83 (100<sup>th</sup>)</b>                                                                | 3-4.6<br><b>3-4.7</b>                           | ~3<br>~3   | 200<br>200        | 38 |

---

## REFERENCES

1. D. Ruan, M. Chen, X. Wen, S. Li, X. Zhou, Y. Che, J. Chen, W. Xiang, S. Li, H. Wang, X. Liu and W. Li, *Nano Energy*, 2021, **90**, 106535.
2. X. Zheng, T. Huang, G. Fang, Y. Pan, Q. Li and M. Wu, *ACS Appl. Mater. Interfaces*, 2019, **11**, 36244-36251.
3. Z. Zhang, F. Liu, Z. Huang, J. Gu, Y. Song, J. Zheng, M. Yi, Q. Mao, M. Bai, X. Fan, B. Hong, Z. Zhang and Y. Lai, *ACS Appl. Energy Mater.*, 2021, **4**, 12954-12964.
4. X. Q. Liao, F. Li, C. M. Zhang, Z. L. Yin, G. C. Liu and J. G. Yu, *Nanomaterials*, 2021, **11**, 609.
5. J. Yang, X. Liu, Y. Wang, X. Zhou, L. Weng, Y. Liu, Y. Ren, C. Zhao, M. Dahbi, J. Alami, D. A. Ei-Hady, G. L. Xu, K. Amine and M. Shao, *Adv. Energy Mater.*, 2021, **11**, 2101956.
6. X. Yang, M. Lin, G. Zheng, J. Wu, X. Wang, F. Ren, W. Zhang, Y. Liao, W. Zhao, Z. Zhang, N. Xu, W. Yang and Y. Yang, *Adv. Funct. Mater.*, 2020, **30**, 2004664.
7. Y. Zou, Y. Cheng, J. Lin, Y. Xiao, F. Ren, K. Zhou, M.-S. Wang, D.-Y. Wu, Y. Yang and J. Zheng, *J. Power Sources*, 2022, **532**, 231372.
8. Y. Zou, A. Fu, J. Zhang, T. Jiao, Y. Yang and J. Zheng, *ACS Sustain. Chem. Eng.*, 2021, **9**, 15042-15052.
9. Y. Zou, J. Zhang, J. Lin, D.-Y. Wu, Y. Yang and J. Zheng, *J. Power Sources*, 2022, **524**, 231049.
10. A. Fu, J. Lin, Z. Zhang, C. Xu, Y. Zou, C. Liu, P. Yan, D.-Y. Wu, Y. Yang and J. Zheng, *ACS Energy Lett.*, 2022, **7**, 1364-1373.

11. Y. Yan, S. Weng, A. Fu, H. Zhang, J. Chen, Q. Zheng, B. Zhang, S. Zhou, H. Yan, C.-W. Wang, Y. Tang, H. Luo, B.-W. Mao, J. Zheng, X. Wang, Y. Qiao, Y. Yang and S.-G. Sun, *ACS Energy Lett.*, 2022, **7**, 2677-2684.
12. K. Zhang, J. Chen, W. Feng, C. Wang, Y.-N. Zhou and Y. Xia, *J. Power Sources*, 2023, **553**, 232311.
13. W. Xue, R. Gao, Z. Shi, X. Xiao, W. Zhang, Y. Zhang, Y. G. Zhu, I. Waluyo, Y. Li, M. R. Hill, Z. Zhu, S. Li, O. Kuznetsov, Y. Zhang, W.-K. Lee, A. Hunt, A. Harutyunyan, Y. Shao-Horn, J. A. Johnson and J. Li, *Energy Environ. Sci.*, 2021, **14**, 6030-6040.
14. J. Zhang, P. F. Wang, P. Bai, H. Wan, S. Liu, S. Hou, X. Pu, J. Xia, W. Zhang, Z. Wang, B. Nan, X. Zhang, J. Xu and C. Wang, *Adv. Mater.*, 2021, **34**, 2108353.
15. Z. Jiang, Z. Zeng, H. Zhang, L. Yang, W. Hu, X. Liang, J. Feng, C. Yu, S. Cheng and J. Xie, *iScience*, 2022, **25**, 103490.
16. L. Wang, J. Ma, C. Wang, X. Yu, R. Liu, F. Jiang, X. Sun, A. Du, X. Zhou and G. Cui, *Adv. Sci.*, 2019, **6**, 1900355.
17. J.-N. Zhang, Q. Li, C. Ouyang, X. Yu, M. Ge, X. Huang, E. Hu, C. Ma, S. Li, R. Xiao, W. Yang, Y. Chu, Y. Liu, H. Yu, X.-Q. Yang, X. Huang, L. Chen and H. Li, *Nat. Energy*, 2019, **4**, 594-603.
18. Y. Huang, Y. Zhu, H. Fu, M. Ou, C. Hu, S. Yu, Z. Hu, C. T. Chen, G. Jiang, H. Gu, H. Lin, W. Luo and Y. Huang, *Angew. Chem. Int. Ed.*, 2020, **133**, 4732-4738.
19. W. Kong, J. Zhang, D. Wong, W. Yang, J. Yang, C. Schulze and X. Liu, *Angew Chem. Int. Ed.*, 2021, **133**, 27308–27318.
20. W. Huang, Q. Zhao, M. Zhang, S. Xu, H. Xue, C. Zhu, J. Fang, W. Zhao, G. Ren, R. Qin, Q. Zhao, H. Chen and F. Pan, *Adv. Energy Mater.*, 2022, **12**, 2200813.

21. Y. He, X. Ding, T. Cheng, H. Cheng, M. Liu, Z. Feng, Y. Huang, M. Ge, Y. Lyu and B. Guo, *J. Energy Chem.*, 2023, **77**, 553-560.
22. N. Qin, Q. Gan, Z. Zhuang, Y. Wang, Y. Li, Z. Li, H. Iftikhar, C. Zeng, G. Liu, Y. Bai, K. Zhang and Z. Lu, *Adv. Energy Mater.*, 2022, **12**, 2201549.
23. X. Tan, T. Zhao, L. Song, D. Mao, Y. Zhang, Z. Fan, H. Wang and W. Chu, *Adv. Energy Mater.*, 2022, **12**, 2200008.
24. J. Qian, L. Liu, J. Yang, S. Li, X. Wang, H. L. Zhuang and Y. Lu, *Nat. Commun.*, 2018, **9**, 4918.
25. X. Wang, Q. Wu, S. Li, Z. Tong, D. Wang, H. L. Zhuang, X. Wang and Y. Lu, *Energy Stor. Mater.*, 2021, **37**, 67-76.
26. Y. Wang, Q. Zhang, Z. C. Xue, L. Yang, J. Wang, F. Meng, Q. Li, H. Pan, J. N. Zhang, Z. Jiang, W. Yang, X. Yu, L. Gu and H. Li, *Adv. Energy Mater.*, 2020, **10**, 2001413.
27. Z. Zhu, H. Wang, Y. Li, R. Gao, X. Xiao, Q. Yu, C. Wang, I. Waluyo, J. Ding, A. Hunt and J. Li, *Adv. Mater.*, 2020, **32**, 2005182.
28. T. Cheng, Q. Cheng, Y. He, M. Ge, Z. Feng, P. Li, Y. Huang, J. Zheng, Y. Lyu and B. Guo, *ACS Appl. Mater. Interfaces*, 2021, **13**, 42917-42926.
29. T. Cheng, Z. Ma, R. Qian, Y. Wang, Q. Cheng, Y. Lyu, A. Nie and B. Guo, *Adv. Funct. Mater.*, 2021, **31**, 2001974.
30. Z. Wang, X. Dai, H. Chen, F. Wu, Y. Mai, S. Li, Y. Gu, J. Li and A. Zhou, *ACS Sustain. Chem. Eng.*, 2022, **10**, 8151-8161.
31. R. Wu, T. Cao, H. Liu, X. Cheng, X. Liu and Y. Zhang, *ACS Appl. Mater. Interfaces*, 2022, **14**, 25524-25533.

32. Y. Liao, Z. Wang, X. Dai, H. Chen, F. Wu, J. Li, Y. Mai and S. Li, *J. Phys. Chem. C*, 2022, **126**, 16627-16635.
33. S. Mao, Z. Shen, W. Zhang, Q. Wu, Z. Wang and Y. Lu, *Adv. Sci.*, 2022, **9**, 2104841.
34. J. Chen, H. Chen, S. Zhang, A. Dai, T. Li, Y. Mei, L. Ni, X. Gao, W. Deng, L. Yu, G. Zou, H. Hou, M. Dahbi, W. Xu, J. Wen, J. Alami, T. Liu, K. Amine and X. Ji, *Adv. Mater.*, 2022, **34**, 2204845.
35. A. Fu, Z. Zhang, J. Lin, Y. Zou, C. Qin, C. Xu, P. Yan, K. Zhou, J. Hao, X. Yang, Y. Cheng, D.-Y. Wu, Y. Yang, M.-S. Wang and J. Zheng, *Energy Stor. Mater.*, 2022, **46**, 406-416.
36. T. Fan, W. Kai, V. K. Harika, C. Liu, A. Nimkar, N. Leifer, S. Maiti, J. Grinblat, M. N. Tsubery, X. Liu, M. Wang, L. Xu, Y. Lu, Y. Min, N. Shpigel and D. Aurbach, *Adv. Funct. Mater.*, 2022, **32**, 2204972.
37. T. Fan, Y. Wang, V. K. Harika, A. Nimkar, K. Wang, X. Liu, M. Wang, L. Xu, Y. Elias, H. Scalar, M. S. Chae, Y. Min, Y. Lu, N. Shpigel and D. Aurbach, *Adv. Sci.*, 2022, **9**, 2202627.
38. X. Yang, C. Wang, P. Yan, T. Jiao, J. Hao, Y. Jiang, F. Ren, W. Zhang, J. Zheng, Y. Cheng, X. Wang, W. Yang, J. Zhu, S. Pan, M. Lin, L. Zeng, Z. Gong, J. Li and Y. Yang, *Adv. Energy Mater.*, 2022, **12**, 2200197.
